# Supplementary material
Source: PubMed Central journal article supplement (PMC6989793)
Supplement: JB.00664-19-s0001.pdf [file JB.00664-19-s0001.pdf]

**Supplementary Materials**  
**to “Structural diversity and conservation of PilZ-related domains”**  
**by M. Y. Galperin and S.-H. Chou**

**Table S1. PilZ-related domains with known 3D structure**

| Organism, locus tag                           | Protein name, UniProt entry                    | Domains in structure      | PDB entry, resolution                                                                                                                                                                                          | Bound c-di-GMP                        | Reference |
|-----------------------------------------------|------------------------------------------------|---------------------------|----------------------------------------------------------------------------------------------------------------------------------------------------------------------------------------------------------------|---------------------------------------|-----------|
| <i>Pseudomonas aeruginosa</i> PA4608          | PilZ or MapZ, <a href="#">CDGBP_PSEAE</a>      | PilZ only                 | <a href="#">1YWU</a> (NMR)<br><a href="#">2L74</a> (NMR)<br><a href="#">5XLY_B</a> , 1.76 Å<br><a href="#">5Y4R_D</a> , 2.30 Å                                                                                 | No<br>Yes<br>Yes<br>Yes               | (1-3)     |
| <i>Xanthomonas citri</i> Xac1133              | PilZ, <a href="#">Q8PND9_XANAC</a>             | PilZ only                 | <a href="#">3CNR_A</a> , 1.90 Å<br><a href="#">4FOU_C</a> , 2.10 Å                                                                                                                                             | No<br>No                              | (4, 5)    |
| <i>Xanthomonas campestris</i> Xcc1024         | PilZ, Xc1028, <a href="#">Q8PBU4_XANCP</a>     | PilZ only                 | <a href="#">3DSG_A</a> , 2.09 Å<br><a href="#">4F48_B</a> , 3.00 Å                                                                                                                                             | No<br>No                              | (6, 7)    |
| <i>Legionella pneumophila</i> lpg0364         | PilZ, <a href="#">Q5ZYK8_LEGPH</a>             | PilZ only                 | <a href="#">4Q63_A</a> , 1.95 Å                                                                                                                                                                                | No                                    | N/A       |
| <i>Rhodobacter sphaeroides</i> RSP_0333       | BcsA, <a href="#">Q3J125_RHOS4</a>             | Glyco_trans_2 - PilZ      | <a href="#">4HG6_A</a> , 3.25 Å<br><a href="#">4P00_A</a> , 3.25 Å<br><a href="#">4P02_A</a> , 2.65 Å<br><a href="#">5E1Y_A</a> , 2.95 Å<br><a href="#">5EJ1_A</a> , 3.40 Å<br><a href="#">5EJZ_A</a> , 2.95 Å | No<br>Yes<br>Yes<br>Yes<br>Yes<br>Yes | (8-10)    |
| <i>Komagataeibacter xylinus</i> AcsAB         | CelA, <a href="#">POCW87_ACSA1_KOMXY</a>       | PilZ only                 | <a href="#">4I86</a> , 2.10 Å                                                                                                                                                                                  | No                                    | (11)      |
| <i>Pseudomonas aeruginosa</i> PA3542          | Alg44, <a href="#">Q9HY69_ALG44_PSEAE</a>      | PilZ only                 | <a href="#">4RTO</a> , 1.8 Å<br><a href="#">4RT1</a> , 1.7 Å<br><a href="#">4XRN</a> , 2.0 Å                                                                                                                   | Yes<br>Yes<br>Yes                     | (12)      |
| <i>Escherichia coli</i> YcgR (b1194)          | YcgR, <a href="#">P76010_YCGR_ECOLI</a>        | PilZN-PilZ                | <a href="#">5Y6F</a> , 2.30 Å                                                                                                                                                                                  | Yes                                   | (13)      |
|                                               |                                                | PilZN (YcgR)              | <a href="#">5Y6H</a> , 1.77 Å                                                                                                                                                                                  | No                                    |           |
|                                               |                                                | PilZ                      | <a href="#">5Y6G</a> , 2.30 Å                                                                                                                                                                                  | Yes                                   |           |
| <i>Pseudomonas putida</i> PP_4397             | FlgZ, <a href="#">Q88EQ6_YCGR_PSEPK</a>        | PilZN-PilZ (YcgR-PilZ)    | <a href="#">2GJG</a> , 2.25 Å<br><a href="#">3KYE</a> , 2.10 Å                                                                                                                                                 | No<br>Yes                             | (14)      |
| <i>Vibrio cholerae</i> VCA0042 (=VC0395_0091) | PlzD, <a href="#">Q9KNC3_YCGRL_VIBCH</a>       | PilZNR-PilZ (YcgR_2-PilZ) | <a href="#">1YLN</a> , 2.20 Å<br><a href="#">2RDE</a> , 1.92 Å<br><a href="#">3KYG</a> , 2.10 Å                                                                                                                | No<br>Yes<br>Yes                      | (14, 15)  |
| <i>Bacillus subtilis</i> BSU22910             | MotI or DgrA, <a href="#">YPFA_BACSU</a>       | PilZNR-PilZ (YcgR_2-PilZ) | <a href="#">5VX6</a> , 3.2 Å                                                                                                                                                                                   | Yes                                   | (16)      |
| <i>Klebsiella pneumoniae</i> KPK_0839         | MrkH, <a href="#">G3FT00_KLEPN</a>             | PilZN-PilZ (YcgR-PilZ)    | <a href="#">5EJL</a> , 2.30 Å<br><a href="#">5KEC</a> , 1.95 Å<br><a href="#">5KED</a> , 2.65 Å<br><a href="#">5KGO</a> , 2.90 Å                                                                               | Yes<br>No<br>No<br>Yes                | (17, 18)  |
| <i>Xanthomonas campestris</i> Xccb100_2234    | aPilZ or Xcc0612, <a href="#">BORT03_XANCB</a> | PilZ_2                    | <a href="#">3PH1</a> , 2.1 Å<br><a href="#">3RQA</a> , 2.1 Å                                                                                                                                                   | No<br>No                              | (19)      |
| <i>Geobacter sulfurreducens</i> GSU3033       | <a href="#">Q748G9_GEOSL</a>                   | DUF5634_N                 | <a href="#">2L1T</a> (NMR)                                                                                                                                                                                     | No                                    | N/A       |

**Table S2. Structural similarity of PilZ domains according to Dali and VAST**

| Organism, protein name<br>(genomic locus tag) <sup>a</sup>                                   | PDB<br>entry           | Alignment length, % identity, RMSD <sup>b</sup> |                     |
|----------------------------------------------------------------------------------------------|------------------------|-------------------------------------------------|---------------------|
|                                                                                              |                        | Dali                                            | VAST                |
| <i>Pseudomonas aeruginosa</i> PilZ, MapZ<br>(PA4608)                                         | <a href="#">2L74_A</a> | 105 aa, 100%, 2.1 Å                             | 102 aa, 100%, 1.5 Å |
| <i>Xanthomonas citri</i> PilZ (Xac1133)                                                      | <a href="#">3CNR_B</a> | 72 aa, 13%, 2.9 Å                               | 64 aa, 12%, 2.6 Å   |
| <i>Xanthomonas campestris</i> PilZ (Xcc1024)                                                 | <a href="#">3DSG_B</a> | 72 aa, 13%, 3.0 Å                               | 61 aa, 16%, 2.4 Å   |
| <i>Legionella pneumophila</i> PilZ (Lpg0364)                                                 | <a href="#">4Q63_A</a> | 88 aa, 11%, 2.7 Å                               | 78 aa, 10%, 2.1 Å   |
| <i>Rhodobacter sphaeroides</i> BcsA (RSP_0333)<br>PilZ domain, aa 578-691                    | <a href="#">5EJZ_A</a> | 98 aa, 12%, 2.6 Å                               | 72 aa, 15%, 1.7 Å   |
| <i>Komagataeibacter xylinus</i> AcsAB, PilZ domain                                           | <a href="#">4I86_B</a> | 92 aa, 20%, 2.6 Å                               | 91 aa, 20%, 2.5 Å   |
| <i>Pseudomonas aeruginosa</i> Alg44 (PA3542),<br>PilZ domain                                 | <a href="#">4RT1_B</a> | 101 aa, 17%, 2.6 Å                              | 98 aa, 17%, 2.2 Å   |
| <i>Escherichia coli</i> YcgR (b1194)<br>PilZ domain, aa 111-244<br>YcgR domain, aa 1-110     | <a href="#">5Y6G_A</a> | 101 aa, 17%, 2.7 Å                              | 83 aa, 19%, 2.2 Å   |
|                                                                                              | <a href="#">5Y6H_A</a> | 80 aa, 4%, 2.9 Å                                | 59 aa, 2%, 1.7 Å    |
| <i>Pseudomonas putida</i> FlgZ (PP_4397)<br>PilZ domain, aa 121-238                          | <a href="#">3KYF_A</a> | 101 aa, 12%, 2.5 Å                              | 93 aa, 13%, 2.3 Å   |
| <i>Klebsiella pneumoniae</i> MrkH<br>PilZ domain, aa 107-236<br>MrkH_N domain, aa 1-106      | <a href="#">5KEC_D</a> | 104 aa, 11%, 3.1 Å                              | 87 aa, 11%, 2.2 Å   |
|                                                                                              | <a href="#">5KEC_D</a> | 77 aa, 10%, 2.9 Å                               | 65 aa, 11%, 1.8 Å   |
| <i>Vibrio cholerae</i> PlzD (VCA0042)<br>PilZ domain, aa 134-247<br>YcgR_2 domain, aa 24-130 | <a href="#">2RDE_A</a> | 99 aa, 14%, 3.1 Å                               | 89 aa, 17%, 2.2 Å   |
|                                                                                              | <a href="#">2RDE_A</a> | 75 aa, 9%, 2.2 Å                                | 66 aa, 11%, 1.6 Å   |
| <i>Bacillus subtilis</i> MotI (BSU22910)<br>PilZ domain, aa 97-208<br>MotI_N domain, aa 1-96 | <a href="#">5VX6_A</a> | 104 aa, 16%, 3.2 Å                              | 96 aa, 17%, 1.9 Å   |
|                                                                                              | <a href="#">5VX6_A</a> |                                                 | 69 aa, 7%, 2.1 Å    |
| <i>Xanthomonas campestris</i> Xcc0612<br>(XccB100_2234)                                      | <a href="#">3RQA_A</a> | 93 aa, 12%, 2.9 Å                               | 84 aa, 13%, 2.2 Å   |
| <i>Geobacter sulfurreducens</i> GSU3033<br>(aa 1-102)                                        | <a href="#">2L1T_A</a> | 85 aa, 5%, 3.1 Å                                | 65 aa, 5%, 2.2 Å    |

<sup>a</sup> – For multidomain structures, the amino acid (aa) boundaries of the canonical PilZ domains are shown in parentheses.

<sup>b</sup> – The overlap length, percent identity, and RMSD values were taken from DALI (20) and VAST (21) alignments of the respective structures against the stand-alone PilZ domain in the *P. aeruginosa* protein MapZ (PDB: [5XLY\\_B](#)).

**Table S3. Examples of tetrameric PilZ domains**

| <b>Organism, taxonomy</b>                 | <b>GenBank accession</b> | <b>UniProt entry</b> | <b>c-di-GMP motifs<sup>a</sup></b> |
|-------------------------------------------|--------------------------|----------------------|------------------------------------|
| <b>Bacteroidetes</b>                      |                          |                      |                                    |
| Sphingobacteriales bacterium              | RYE43434                 | A0A4Q3G9X4           | Yes                                |
| <b>Deferribacteres</b>                    |                          |                      |                                    |
| Calditerrivibrio nitroreducens            | ADR18856                 | E4THN1               | Yes                                |
| Deferribacter desulfuricans               | BAI79927                 | D3PBF4               | Yes                                |
| Geovibrio thiophilus                      | QAR34335                 | A0A3R5Z107           | No                                 |
| Denitrovibrio acetiphilus                 | ADD69612                 | D4H6D8               | No                                 |
| Seleniivibrio woodruffii                  | TCK61742                 | A0A4R1KBA3           | No                                 |
| <b>Nitrospinae</b>                        |                          |                      |                                    |
| Nitrospinae bacterium                     | HBK81472                 | A0A355B8P2           | Yes                                |
| Nitrospinae bacterium                     | MAE05034                 | A0A2D5UAS9           | Yes                                |
| <b>Nitrospirae</b>                        |                          |                      |                                    |
| Leptospirillum ferriphilum ML-04          | AFS54475                 | J9ZCV6               | No                                 |
| Ca. Magnetobacterium bavaricum            | KJU82198                 | A0A0F3GNC4           | Yes                                |
| Nitrospira defluvii                       | CBK42057                 | D8PFM0               | Yes                                |
| Nitrospira moscoviensis NSP M-1           | ALA58562                 | A0A0K2GD75           | Yes                                |
| Nitrospira lenta BS10                     | SPP65144                 | A0A330L5V6           | Yes                                |
| Ca. Nitrospira inopinata                  | CUQ67246                 | A0A0S4KVQ2           | Yes                                |
| Ca. Nitrospira nitrificans COMA2          | CUS31512                 | A0A0S4L4J9           | Yes                                |
| Thermodesulfovibrio aggregans             | GAQ94083                 | A0A0U9HLW8           | Yes                                |
| Thermodesulfovibrio yellowstonii DSM 1134 | ACI20485                 | B5YK90               | Yes                                |
| <b>Planctomycetes</b>                     |                          |                      |                                    |
| Ca. Scalindua brodae                      | KHE92567                 | A0A0B0EHM4           | Yes                                |
| Ca. Scalindua japonica                    | GAX60402                 | A0A286TWZ4           | Yes                                |
| <b>Candidatus Tectomicrobia</b>           |                          |                      |                                    |
| Ca. Tectomicrobia bacterium               | OGL68512                 | A0A1F7TR77           | Yes                                |
| Ca. Tectomicrobia bacterium               | OGL59976                 | A0A1F7T1V7           | Yes                                |
| <b>Thermodesulfobacteria</b>              |                          |                      |                                    |
| Caldimicrobium thiodismutans TF1          | BAU22708                 | A0A0U5AKT9           | Yes                                |
| Thermodesulfatator indicus DSM 15286      | AEH44194                 | F8AE58               | Yes                                |
| Thermodesulfobacterium commune            | AIH03543                 | A0A075WT12           | Yes                                |
| Thermodesulfobacterium geofontis          | AEH23615                 | F8C3H8               | Yes                                |
| Thermosulfurimonas dismutans              | OAQ21198                 | A0A179D6G4           | Yes                                |
| <b>Proteobacteria</b>                     |                          |                      |                                    |
| <b>Acidithiobacillia</b>                  |                          |                      |                                    |
| Acidithiobacillus caldus SM-1             | AEK58128                 | F9ZN85               | No                                 |
| Acidithiobacillus thiooxidans             | OCX69789                 | A0A1C2I1C8           | No                                 |
| <b>Alphaproteobacteria</b>                |                          |                      |                                    |
| Magnetococcus marinus MC-1                | ABK44455                 | A0L912               | Yes                                |
|                                           | ABK44456                 | A0L913               | No                                 |
| Magnetofaba australis IT-1                | OSM02482                 | A0A1Y2K3E3           | Yes                                |
|                                           | OSM02483                 | A0A1Y2K3B3           | No                                 |

|                                         |          |            |     |
|-----------------------------------------|----------|------------|-----|
| <b>Betaproteobacteria</b>               |          |            |     |
| <b><i>Burkholderiales</i></b>           |          |            |     |
| Chitinimonas taiwanensis DSM 18899      | SFZ79374 | A0A1K2HRK9 | No  |
| Janthinobacterium sp. B9-8              | AMC34180 | A0A0X8GL31 | No  |
| Thiomonas arsenitoxydans                | CAZ88219 | D6CQD9     | No  |
| Thiomonas intermedia K12                | ADG30598 | D5X0F2     | No  |
| <b><i>Neisseriales</i></b>              |          |            |     |
| Andreprevotia lacus DSM 23236           | SMC24803 | A0A1W1XLH4 | No  |
| Aquitalea magnusonii SM6                | KJV27573 | A0A0F3K8N4 | No  |
| Chromobacterium haemolyticum H4137      | OQS41564 | A0A1W0D3J5 | No  |
| Chromobacterium violaceum ATCC 12472    | AAQ61178 | Q7NSA9     | No  |
| Iodobacter sp. BJB302                   | PHV03655 | A0A2G3JGH2 | No  |
| Vogesella sp. EB                        | KMJ54682 | A0A0J5GJX3 | No  |
| <b><i>Nitrosomonadales</i></b>          |          |            |     |
| Methylobacillus sp. MM3                 | OAJ71600 | A0A1A9NQ49 | No  |
| Novimethylophilus kurashikiensis La2-4  | GBG13164 | A0A2R5F957 | No  |
| Sulfuricella denitrificans skB26        | BAN35494 | S6ALD5     | No  |
| Sulfurirhabdus autotrophica DSM 100309  | TCV90146 | A0A4R3YDM4 | No  |
| Sulfuritortus calidifontis DSM 103923   | TCS70553 | A0A4R3JTB5 | No  |
| <b><i>Rhodocyclales</i></b>             |          |            |     |
| Rhodocyclales bacterium GWA2_65_20      | OHC67057 | A0A1G3HE94 | No  |
| <b>Gammaproteobacteria</b>              |          |            |     |
| <b><i>Alteromonadales</i></b>           |          |            |     |
| Alteromonas lipolytica                  | OFI36423 | A0A1E8FLX1 | No  |
| Alteromonas macleodii                   | AFT74208 | A0A1E7DF04 | No  |
| Pseudoalteromonas atlantica T6c         | ABG40247 | Q15V41     | No  |
| <b><i>Cellvibrionales</i></b>           |          |            |     |
| Cellvibrio japonicus Ueda107            | ACE83634 | B3PFR1     | Yes |
| Congregibacter litoralis KT71           | EAQ98448 | A4A601     | No  |
| Ca. Endobugula sertula                  | ODS24617 | A0A1D2QSR9 | Yes |
| Marinimicrobium koreense DSM 16974      | ROQ20302 | A0A3N1NN93 | Yes |
| Simidiua agarivorans SA1 = DSM 21679    | AFU99140 | K4KLP2     | Yes |
| Saccharophagus degradans 2-40           | ABD81068 | Q21JR1     | Yes |
| Teredinibacter turnerae T7901           | ACR11340 | C5BU89     | Yes |
| <b><i>Chromatiales</i></b>              |          |            |     |
| Acidihalobacter prosperus               | AOV16626 | A0A1D8K6R8 | No  |
| Ectothiorhodospira haloalkaliphila      | AHK79421 | W8KV09     | No  |
| Ectothiorhodospira sp. PHS-1            | EHQ51976 | H1G2D9     | No  |
| Imhoffiella purpurea                    | EXJ16754 | W9VBD1     | Yes |
| Marichromatium purpuratum 984           | AHF03627 | W0DYU7     | No  |
| Nitrosococcus halophilus Nc 4           | ADE15429 | D5BV79     | No  |
| Thioalkalivibrio sp. K90mix             | ADC71663 | D3S9F8     | No  |
| Thioalkalivibrio sulfidiphilus HL-EbGr7 | ACL73055 | B8GT40     | No  |
| Thiocystis violascens DSM 198           | AFL72424 | I3Y606     | No  |
| Thiorhodococcus drewsii AZ1             | EGV30492 | G2E330     | No  |
| Thiorhodospira sibirica ATCC 700588     | EGZ47185 | G4E4N4     | No  |
| <b><i>Immundisolibacterales</i></b>     |          |            |     |
| Immundisolibacter cernigliae            | ANX04033 | A0A1B1YTP7 | No  |
| <b><i>Legionellales</i></b>             |          |            |     |
| Fluoribacter bozemaniae WIGA            | KTC74835 | A0A0W0RUT1 | Yes |
| Legionella pneumophila                  | AAU27996 | Q5ZU81     | Yes |
| Tatlockia micdadei NZ2015               | ARG97104 | A0A098GHK6 | Yes |

|                                              |          |            |                   |
|----------------------------------------------|----------|------------|-------------------|
| <b><i>Methylococcales</i></b>                |          |            |                   |
| Methylobacter tundripaludum SV96             | EGW20922 | G3J150     | Yes               |
| Methylocaldum marinum                        | BBA37268 | A0A250L021 | Yes <sup>b</sup>  |
| Methylomagnum ishizawai                      | SMF95440 | A0A1Y6CYY6 | Yes               |
| Methylomonas methanica MC09                  | AEG00094 | G0A1N3     | Yes               |
|                                              | AEG00685 | F9ZV75     | Yes               |
| <b><i>Nevskiales</i></b>                     |          |            |                   |
| Fontimonas thermophila                       | SFF33484 | A0A1I2HTV9 | No                |
| Hydrocarboniphaga daqingensis                | SHG49207 | A0A1M5K8U8 | No                |
| Hydrocarboniphaga effusa AP103               | EIT69541 | I81H1      | No                |
| Nevskiales bacterium                         | MBV61603 | A0A2E9ZY24 | No                |
| Solimonas aquatica                           | SEQ62310 | A0A1H9HIZ0 | No                |
| Steroidobacter denitrificans                 | AMN46591 | A0A127FAD2 | No                |
| <b><i>Pseudomonadales</i></b>                |          |            |                   |
| Acinetobacter baumannii                      | SSU13771 | A0A1G5DWA1 | Yes <sup>b</sup>  |
| Pseudomonas aeruginosa PAO1                  | AAG06377 | Q9HZL5     | Yes <sup>b</sup>  |
| Pseudomonas aeruginosa UCBPP-PA14            | ABJ12226 | A0A0H2ZBV1 | Yes <sup>b</sup>  |
| Pseudomonas fluorescens Pf0-1                | ABA75597 | Q3K9F7     | No                |
| Pseudomonas putida KT2440                    | AAN67766 | Q88KY6     | No                |
| Pseudomonas stutzeri A1501                   | ABP80294 | A4VMU3     | No                |
| Pseudomonas syringae pv. syringae B728a      | AAV36947 | Q4ZV75     | Yes? <sup>c</sup> |
| Thiopseudomonas denitrificans DSM 28679      | TDQ40262 | A0A4R6U470 | Yes? <sup>c</sup> |
| <b><i>Salinisphaerales</i></b>               |          |            |                   |
| Salinisphaeraeaceae bacterium CPC72          | MAA76332 | A0A2D4SGP5 | No                |
| <b><i>Sedimenticola</i></b>                  |          |            |                   |
| Sedimenticola thiotaurini                    | AKH19540 | A0A0F7JXL1 | No                |
| <b><i>Thiotrichales</i></b>                  |          |            |                   |
| Cycloclasticus sp. strain P1                 | AFT66357 | K0C3W4     | Yes               |
| Hydrogenovibrio crunogenus XCL-2             | ABB42072 | Q31FK1     | Yes               |
| Methylophaga frappieri JAM7                  | AFJ02461 | I1YHR8     | Yes               |
| Thiomicrospira aerophila AL3                 | AHF02343 | W0DYJ5     | Yes               |
| <b><i>Vibrionales</i></b>                    |          |            |                   |
| Vibrio cholerae O1 biovar El Tor str. N16961 | AAF95033 | Q9KQW3     | No                |
| Aliivibrio fischeri ES114                    | AAW87531 | Q5E0B5     | No                |
| Enterovibrio norvegicus DSM 15893            | SFP54731 | A0A1I5R8T8 | No                |
| Photobacterium profundum SS9                 | CAG20776 | Q6LPK0     | No                |
| Vibrio vulnificus YJ016                      | BAC95128 | Q7MIZ9     | No                |
| <b><i>Xanthomonadales</i></b>                |          |            |                   |
| Aquimonas voraii                             | SDD89738 | A0A1G6YH90 | No                |
| Dyella japonica DSM 16301                    | KLD62119 | A0A0G9GYY7 | No                |
| Dyella thiooxydans                           | AND67566 | A0A160MWT4 | No                |
| Frateuria aurantia DSM 6220                  | AFC86459 | H8L3D7     | No                |
| Luteibacter rhizovicinus DSM 16549           | APG02804 | A0A1L3EP40 | No                |
| Luteibacter yejuensis                        | KJV36288 | A0A0F3KYJ5 | No                |
| Luteimonas sp. FCS-9                         | KLJ02740 | A0A0H1AUJ2 | No                |
| Lysobacter defluvii IMMIB APB-9              | KGO98734 | A0A0A0M8Z6 | No                |
| Lysobacter spongiicola DSM 21749             | SKA21588 | A0A1T4S0W8 | No                |
| Mizugakiibacter sediminis                    | GAP65255 | A0A0K8QJZ1 | No                |
| Pseudoxanthomonas dokdonensis                | KRG71076 | A0A0R0CZ69 | No                |
| Pseudoxanthomonas spadix BD-a59              | AER55289 | G7UMX8     | No                |
| Rhodanobacter sp. RIFOXYA1_FULL_67_6         | OHC44793 | A0A1G3FKY0 | No                |
| Stenotrophomonas maltophilia R551-3          | ACF51593 | B4SIK4     | No                |

|                                           |          |            |                   |
|-------------------------------------------|----------|------------|-------------------|
| <b>Deltaproteobacteria</b>                |          |            |                   |
| Desulfarculus baarsii DSM 2075            | ADK85379 | E1QLB4     | Yes               |
| Desulfatibacillum alkenivorans DSM 16219  | SHL13587 | A0A1M6Y5T2 | Yes               |
| Desulfonatronospira thiodismutans ASO3-1  | EFI34632 | D6SPF6     | Yes? <sup>c</sup> |
| Desulfovibrio alaskensis G20              | ABB38944 | Q30ZF2     | Yes? <sup>c</sup> |
| Desulfovibrio magneticus RS-1             | BAH75713 | C4XSL6     |                   |
| Desulfurivibrio alkaliphilus AHT 2        | ADH85899 | D6Z2X4     | Yes               |
| Pseudodesulfovibrio aespoensis Aspo-2     | ADU62726 | E6VYG3     | Yes? <sup>c</sup> |
| Syntrophus aciditrophicus SB              | ABC77079 | Q2LSL7     | Yes               |
| Syntrophus gentianae DSM 8423             | SEM26456 | A0A1H7WXW1 | Yes               |
| <b>Zetaproteobacteria</b>                 |          |            |                   |
| Mariprofundus ferrooxydans PV-1           | EAU54705 | Q0EZJ9     | Yes               |
| Zetaproteobacteria bacterium CG2_30_59_37 | OIQ01522 | A0A1J5IWI7 | Yes               |

<sup>a</sup> – Presence of RxxxR and [D/N]hSxxG motifs, which is an indication of the ability to bind c-di-GMP.

<sup>b</sup> – The first residue of the [D/N]hSxxG motif is Ser, which still allowed c-di-GMP binding in *P. aeruginosa* PA2989.

<sup>c</sup> – A modified [D/N]hSxxG motif, c-di-GMP binding has not been tested.

## References

1. **Ramelot TA, Yee A, Cort JR, Semesi A, Arrowsmith CH, Kennedy MA.** 2007. NMR structure and binding studies confirm that PA4608 from *Pseudomonas aeruginosa* is a PilZ domain and a c-di-GMP binding protein. *Proteins* **66**:266-271.
2. **Zhu Y, Yuan Z, Gu L.** 2017. Structural basis for the regulation of chemotaxis by MapZ in the presence of c-di-GMP. *Acta Crystallogr D Struct Biol* **73**:683-691.
3. **Yan XF, Xin L, Yen JT, Zeng Y, Jin S, Cheang QW, Fong R, Chiam KH, Liang ZX, Gao YG.** 2018. Structural analyses unravel the molecular mechanism of cyclic di-GMP regulation of bacterial chemotaxis via a PilZ adaptor protein. *J Biol Chem* **293**:100-111.
4. **Guzzo CR, Salinas RK, Andrade MO, Farah CS.** 2009. PILZ protein structure and interactions with PILB and the FIMX EAL domain: implications for control of type IV pilus biogenesis. *J Mol Biol* **393**:848-866.
5. **Guzzo CR, Dunger G, Salinas RK, Farah CS.** 2013. Structure of the PilZ-FimXEAL-c-di-GMP complex responsible for the regulation of bacterial type IV pilus biogenesis. *J Mol Biol* **425**:2174-2197.
6. **Li TN, Chin KH, Liu JH, Wang AH, Chou SH.** 2009. XC1028 from *Xanthomonas campestris* adopts a PilZ domain-like structure without a c-di-GMP switch. *Proteins* **75**:282-288.
7. **Chin KH, Kuo WT, Yu YJ, Liao YT, Yang MT, Chou SH.** 2012. Structural polymorphism of c-di-GMP bound to an EAL domain and in complex with a type II PilZ-domain protein. *Acta Crystallogr D Biol Crystallogr* **68**:1380-1392.
8. **Morgan JL, Strumillo J, Zimmer J.** 2013. Crystallographic snapshot of cellulose synthesis and membrane translocation. *Nature* **493**:181-186.
9. **Morgan JL, McNamara JT, Zimmer J.** 2014. Mechanism of activation of bacterial cellulose synthase by cyclic di-GMP. *Nat Struct Mol Biol* **21**:489-496.
10. **Morgan JL, McNamara JT, Fischer M, Rich J, Chen HM, Withers SG, Zimmer J.** 2016. Observing cellulose biosynthesis and membrane translocation in crystallo. *Nature* **531**:329-334.

11. **Fujiwara T, Komoda K, Sakurai N, Tajima K, Tanaka I, Yao M.** 2013. The c-di-GMP recognition mechanism of the PilZ domain of bacterial cellulose synthase subunit A. *Biochem Biophys Res Commun* **431**:802-807.
12. **Whitney JC, Hay ID, Li C, Eckford PD, Robinson H, Amaya MF, Wood LF, Ohman DE, Bear CE, Rehm BH, Howell PL.** 2011. Structural basis for alginate secretion across the bacterial outer membrane. *Proc Natl Acad Sci USA* **108**:13083-13088.
13. **Hou Y, Li D-F, Wang D-C.** 2013. Crystallization and preliminary X-ray analysis of the flagellar motor 'brake' molecule YcgR with c-di-GMP from *Escherichia coli*. *Acta Crystallogr F Struct Biol Cryst Commun* **69**:663-665.
14. **Ko J, Ryu KS, Kim H, Shin JS, Lee JO, Cheong C, Choi BS.** 2010. Structure of PP4397 reveals the molecular basis for different c-di-GMP binding modes by Pilz domain proteins. *J Mol Biol* **398**:97-110.
15. **Benach J, Swaminathan SS, Tamayo R, Handelman SK, Folta-Stogniew E, Ramos JE, Forouhar F, Neely H, Seetharaman J, Camilli A, Hunt JF.** 2007. The structural basis of cyclic diguanylate signal transduction by PilZ domains. *EMBO J* **26**:5153-5166.
16. **Subramanian S, Gao X, Dann CE, 3rd, Kearns DB.** 2017. MotI (DgrA) acts as a molecular clutch on the flagellar stator protein MotA in *Bacillus subtilis*. *Proc Natl Acad Sci USA* **114**:13537-13542.
17. **Schumacher MA, Zeng W.** 2016. Structures of the activator of *K. pneumoniae* biofilm formation, MrkH, indicates PilZ domains involved in c-di-GMP and DNA binding. *Proc Natl Acad Sci USA* **113**:10067-10072.
18. **Wang F, He Q, Su K, Gao F, Huang Y, Lin Z, Zhu D, Gu L.** 2016. The PilZ domain of MrkH represents a novel DNA binding motif. *Protein Cell* **7**:766-772.
19. **Li TN, Chin KH, Fung KM, Yang MT, Wang AH, Chou SH.** 2011. A novel tetrameric PilZ domain structure from xanthomonads. *PLoS One* **6**:e22036.
20. **Holm L, Laakso LM.** 2016. Dali server update. *Nucleic Acids Res* **44**:W351-W355.
21. **Madej T, Lanczycki CJ, Zhang D, Thiessen PA, Geer RC, Marchler-Bauer A, Bryant SH.** 2014. MMDB and VAST+: tracking structural similarities between macromolecular complexes. *Nucleic Acids Res* **42**:D297-303.

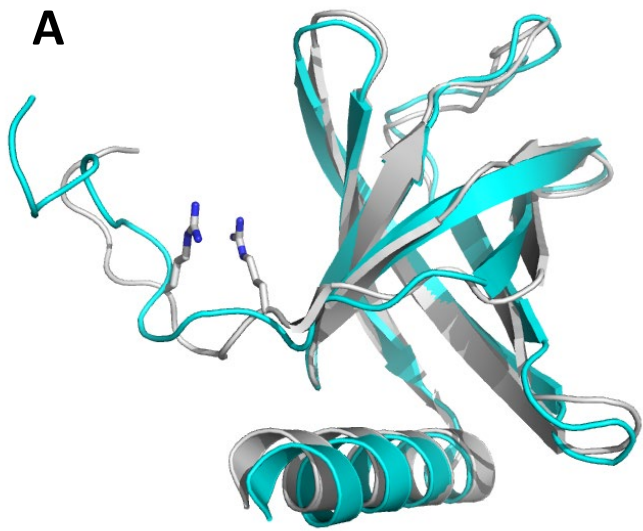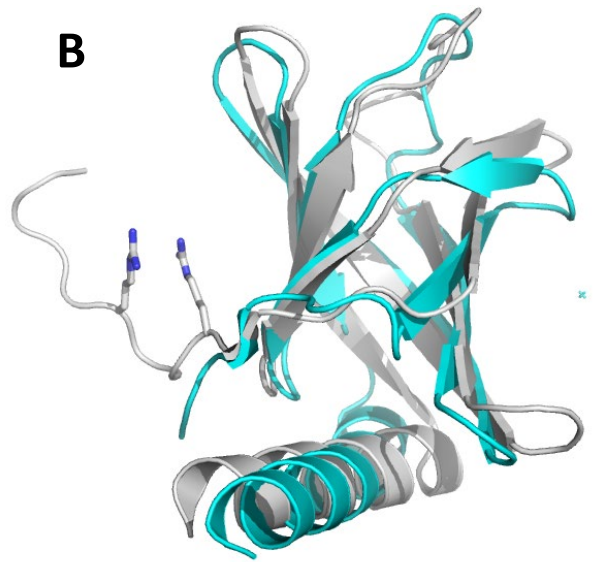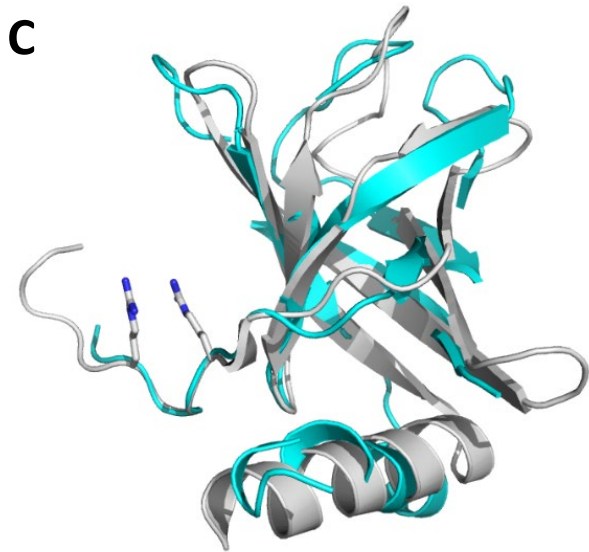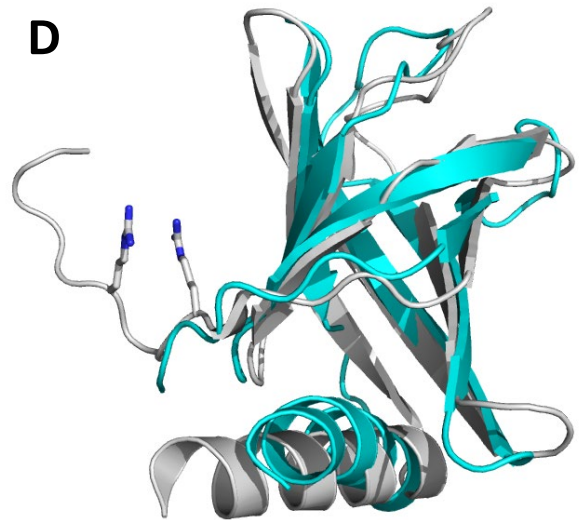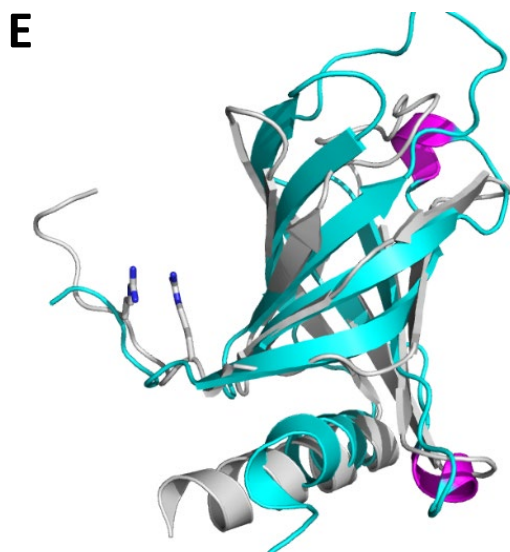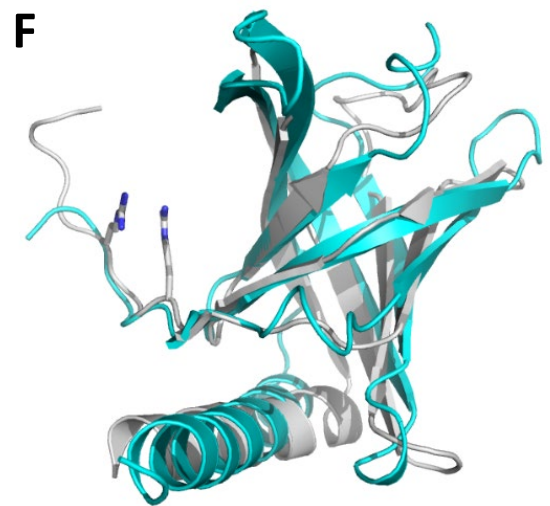



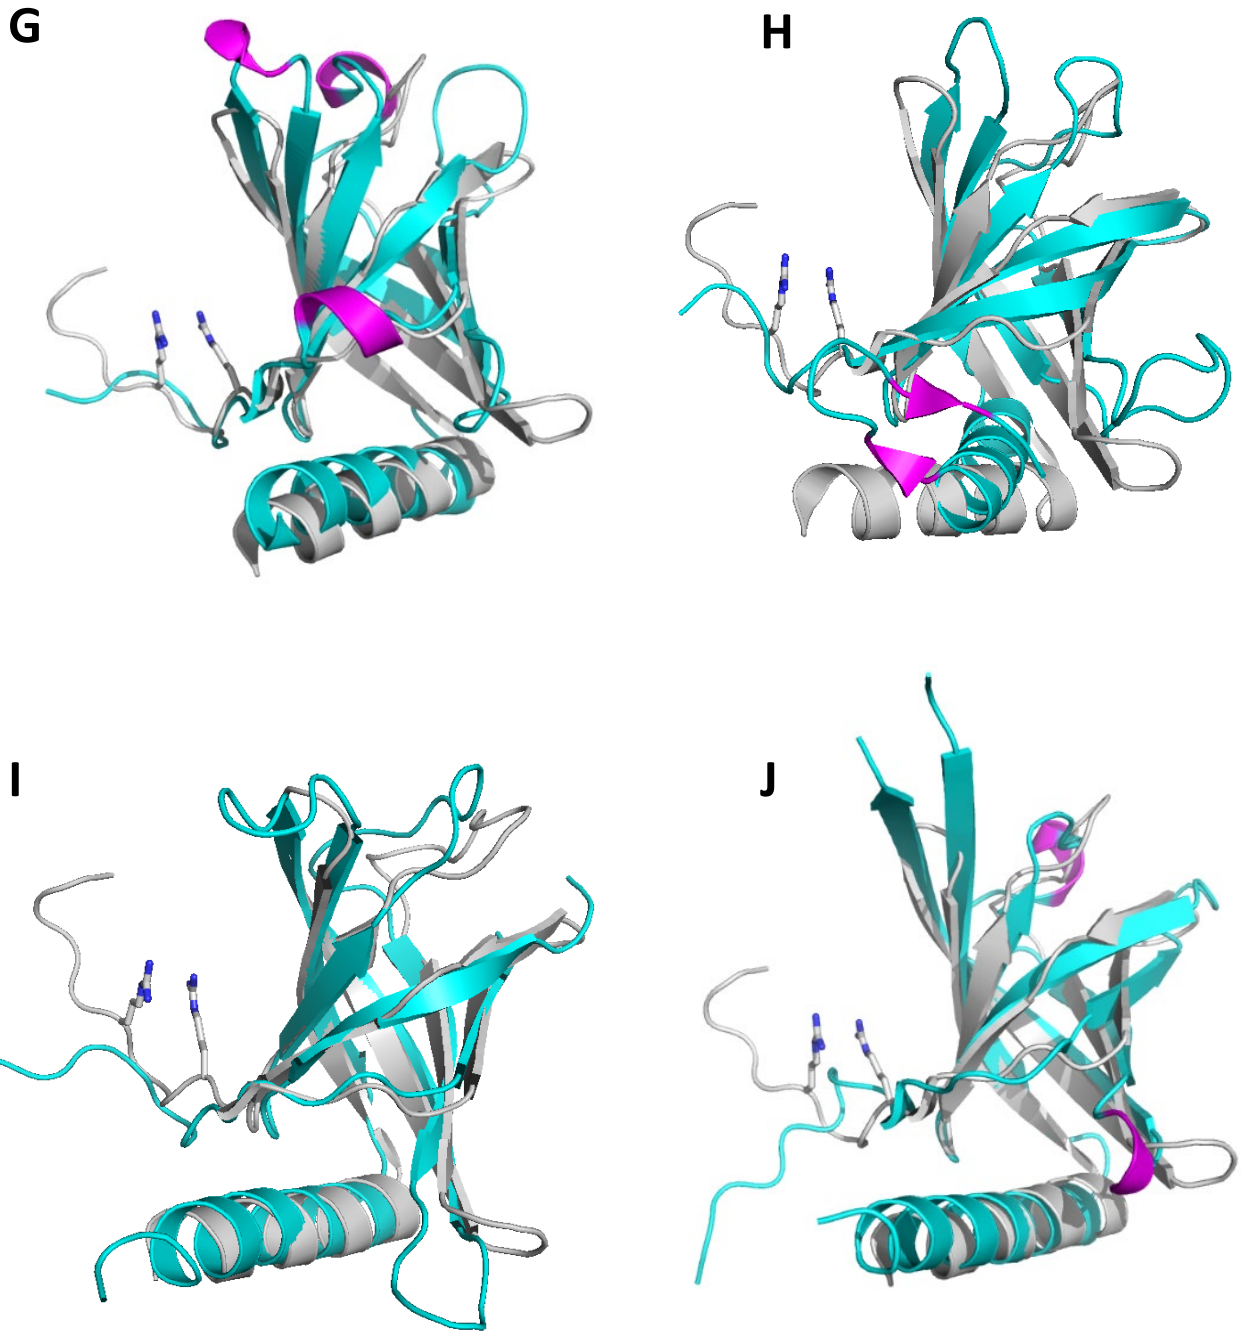

**Figure S1. Structural superpositions of *P. aeruginosa* MapZ with canonical PilZ domains.**

Stand-alone PilZ domain protein MapZ (PA4608) from *P. aeruginosa* (PDB entry 5XLY\_B, residues 4-107) superposed against canonical PilZ domains listed in Table 1: 2L74 (A); 4Q63 (B); 4RT1 (C); 4I86 (D); 5EJZ (E); 5Y6G (F); 3KYF (G); 2RDE (H); 5VX6 (I), and 5KEC (J). In all panels, the MapZ structure is in light grey, aligned structural elements from other proteins are in cyan, structural elements that deviate from the MapZ structure are in magenta. The Arg residues of the MapZ RxxxR motif are in stick representation.



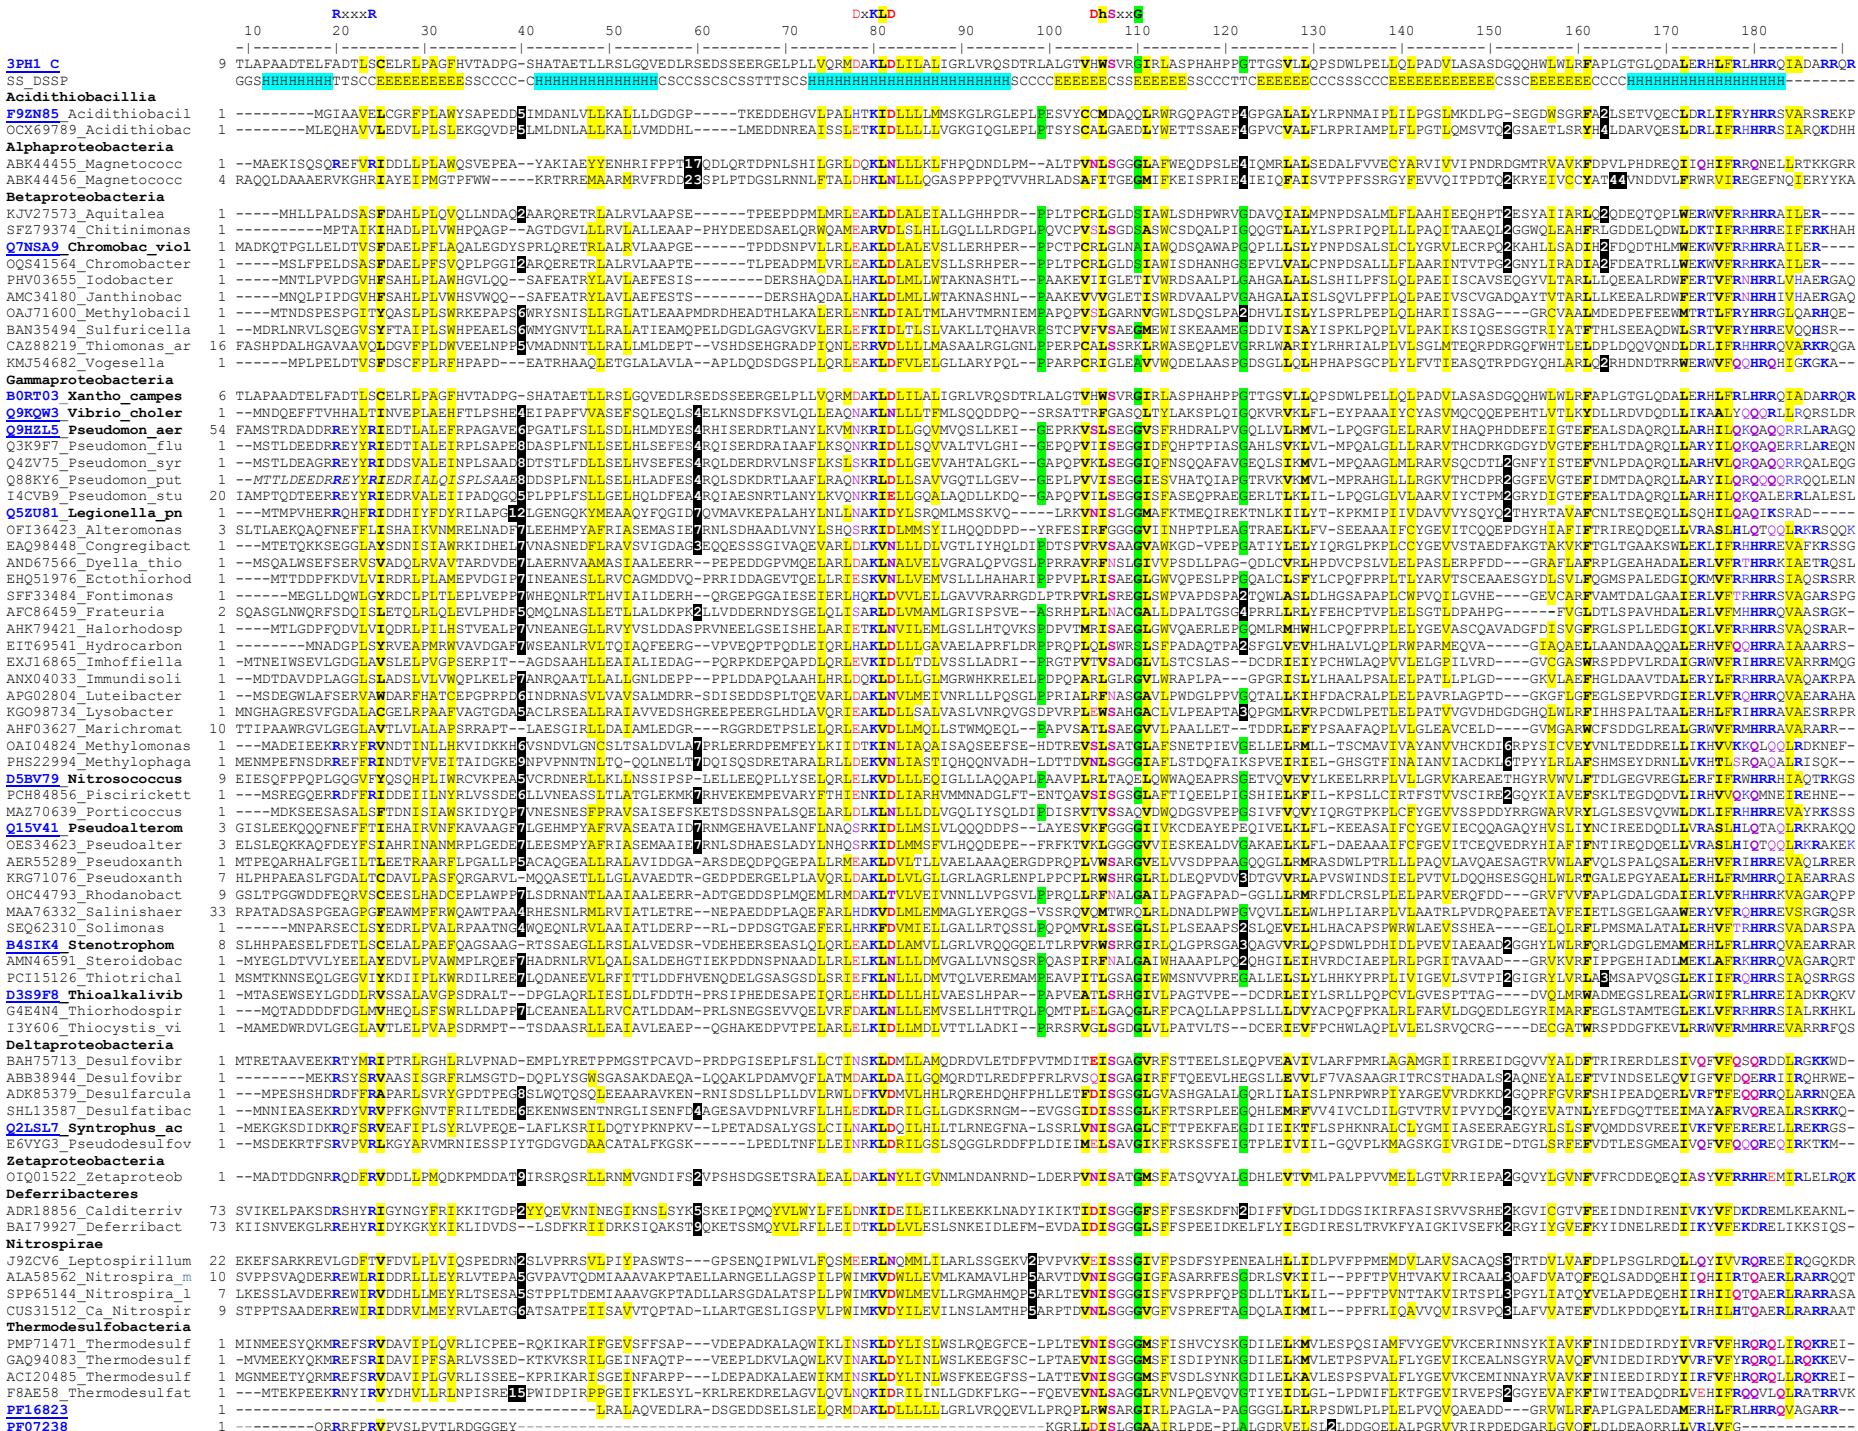

**Figure S3. Sequence alignment of representative tetramer-forming PilZ domains (tPilZ).** The top line shows the positions of c-di-GMP binding RxxxR and [D/N]hSxxG motifs and the tetramer-forming [DEN]x[KR]h[DEN] motif. The second and third lines show the sequence and secondary structure of the tPilZ protein from *X. campestris* (PDB: 3PH1). Proteins are listed under their GenBank accessions, proteins from model organisms are shown under their UniProt identifiers and linked to the respective UniProt entries. Conserved hydrophobic residues are shaded yellow, those forming the hydrophobic pocket are in bold; small (turn) residues are shaded green. Conserved positively charged residues (R, K, H) are in blue, acidic (D, E) are in red, N, Q, S and T are in purple. Two bottom lines show the sequences of Pfam entries for PilZ and PilZ\_2 motifs.

A

**Borreliaceae**

BB0733 *B. burgdorferi* 1 --MLLSRKIRDYGAKYRGKEIKMST<sup>E</sup>INSFLNLRNTIEMRI-GSYTAF<sup>E</sup>VIY<sup>S</sup>ISMDSLKLIFQEDTVIPALAK-NKNLGS<sup>I</sup>QLKKNSDSK-SSAA<sup>FF</sup>F<sup>FF</sup>FLSVKLLSASAYSSLNKEYNLLTLEFLSPAE<sup>EE</sup>IAIKV<sup>G</sup>KLLDLKLG 141  
AEL69950 *B. afzelii* 1 --MLLSRKIRDYGAKYRGKEIKMST<sup>E</sup>INSFLNLRNTIEMRM-GAYSVL<sup>G</sup>VIY<sup>S</sup>ISMDSLKLIFQEDTVIPALAK-NKNLGS<sup>I</sup>QLKKNSDSK-NSAA<sup>FF</sup>F<sup>FF</sup>FLSVKLLSASAYSSQNKKEYNLLTLEFLSPAE<sup>EE</sup>IAIKV<sup>G</sup>KLLDLKLG 141  
ACH93662 *B. duttonii* 1 --MFFSKKIKDYEAKYRGKEIKMST<sup>E</sup>INSFLN<sup>I</sup>KNSVEIKV-GTVVVV<sup>G</sup>VIY<sup>S</sup>ISMNFIKLLIQQDEILPILAQ-NGNLGNLNIKNYDNNV-VDNA<sup>FC</sup>I<sup>2</sup>LIVKLVSTSS<sup>Y</sup>SIQNKKEYNLLTLEFVSSM<sup>PE</sup>ELIKV<sup>G</sup>KLLDLKLG 142  
ACH94956 *B. recurrent* 1 --MFFSKKIKDYEAKYRGKEIKMST<sup>E</sup>INSFLN<sup>I</sup>KNSVEIKV-GTVVVV<sup>G</sup>VIY<sup>S</sup>ISMNFIKLLIQQDEILPILAQ-NGNLGNLNIKNYDNNV-VDNA<sup>FC</sup>I<sup>2</sup>LIVKLVSTSS<sup>Y</sup>SIQNKKEYNLLTLEFVSSM<sup>PE</sup>ELIKV<sup>G</sup>KLLDLKLG 142  
AA18049 *B. turicatae* 1 --MFLSRKIKDYEAKYRGKEIKMST<sup>E</sup>INSFLN<sup>I</sup>KNSVEIRV-GNYLAY<sup>G</sup>VIY<sup>S</sup>ISMNAIKLLIQQEDKVLVLAQ-NGNSGN<sup>I</sup>QF<sup>KS</sup>FDNVG--DDS<sup>FF</sup>I<sup>2</sup>LIVKLVSTSS<sup>Y</sup>SVQEKEYNLLTLEFLSPAE<sup>EE</sup>VAVIK<sup>G</sup>KLLDLKLG 141  
ACL34890 *B. garinii* 1 MLSSKKNIIKNYEVYK<sup>G</sup>KEIKI<sup>ST</sup>EINFLN<sup>I</sup>FSTV<sup>K</sup>MVI-DNYSM<sup>F</sup>G<sup>I</sup>Y<sup>S</sup>ISMNYIRIIFKKEKNETLLILAKNKNLCS<sup>I</sup>RLAENSYPK-NNK<sup>T</sup>Y<sup>F</sup>HFLPVELLDIYAYSYQDKKEYNLLTLEFLSSLE<sup>EE</sup>IAIKV<sup>G</sup>KLLDLKLG 144

**Spirochaetaceae**

TDE0214 *T. denticola* 1 MAFASQQLNRYNYLKNIDVTF<sup>SK</sup>E<sup>V</sup>VSTLNFEPKQV<sup>F</sup>VRCSGGQ<sup>W</sup>PC<sup>I</sup>INSASMTKAK<sup>I</sup>ICGKKS<sup>G</sup>FLARLRSGITSVNIR<sup>FA</sup>FFDETEGKDSLS<sup>FF</sup>--VAALVGISSY<sup>E</sup>EAGNQD<sup>L</sup>VLT<sup>F</sup>EY<sup>T</sup>QRA<sup>DD</sup>LI<sup>E</sup>KL<sup>G</sup>GILLEAN<sup>I</sup>N 144  
TP\_0086 *T. pallidum* 13 VEFATREQLNRYNYLKNIDVTF<sup>SK</sup>D<sup>V</sup>MQALCFNARQ<sup>V</sup>CVRSAGGQ<sup>CS</sup>VMN<sup>SV</sup>SMVGAK<sup>V</sup>ILSRKSSLESIQVEGASVSR<sup>FS</sup>FFESDARDAVS<sup>FF</sup>--V<sup>T</sup>ARV<sup>L</sup>GV<sup>E</sup>DY<sup>QA</sup>-STELV<sup>V</sup>LSV<sup>A</sup>YTQ<sup>R</sup>IP<sup>DM</sup>LIERL<sup>G</sup>LVEAN<sup>I</sup>S 155  
Alkalispirochaeta 1 MALTTSQQLNRYNYLKNIDVTF<sup>SK</sup>Q<sup>E</sup>FEHTEV<sup>FT</sup>Q<sup>E</sup>IKALFLN<sup>T</sup>KQ<sup>IF</sup>IKCLGYQ<sup>W</sup>PC<sup>I</sup>VY<sup>S</sup>SSMTGAR<sup>V</sup>ITTLQPSLKAALS<sup>K</sup>SKN<sup>M</sup>VSL<sup>R</sup>FS<sup>I</sup>IQREKTDPLA<sup>FF</sup>--V<sup>T</sup>ARIT<sup>G</sup>FS<sup>P</sup>Y<sup>G</sup>DP<sup>S</sup>KG<sup>L</sup>S<sup>F</sup>ITL<sup>H</sup>Y<sup>T</sup>QR<sup>FP</sup><sup>DD</sup>LIERL<sup>G</sup>NLSAT<sup>I</sup>S 144  
Marispirochaeta 1 MALITSQQLSRFFERYNDVNLTF<sup>TK</sup>D<sup>V</sup>VRATRL<sup>L</sup>QRNTH<sup>I</sup>KCLGDH<sup>W</sup>PC<sup>V</sup>LY<sup>S</sup>CSMKGAK<sup>V</sup>IASLS<sup>K</sup>SEY<sup>E</sup>KLKSANNL<sup>V</sup>TLHL<sup>L</sup>FAQEDK<sup>ST</sup>PLS<sup>FF</sup>--V<sup>T</sup>SKING<sup>F</sup>TP<sup>Y</sup>DK<sup>S</sup>K<sup>P</sup>NL<sup>N</sup>FLS<sup>L</sup>EY<sup>T</sup>QR<sup>FP</sup><sup>DD</sup>LIV<sup>L</sup>GTLEAN<sup>I</sup>N 144  
Oceanispirochaeta 1 MAIVTNQTIKELFNFRSIEVTF<sup>NK</sup>E<sup>V</sup>SKATGLQ<sup>RR</sup>IFL<sup>K</sup>F<sup>K</sup>ESAR<sup>PC</sup>ILY<sup>S</sup>ASMEAA<sup>R</sup>VI<sup>V</sup>SLPTAILQNLKENES<sup>N</sup>VAL<sup>K</sup>LS<sup>FI</sup>KDEQ<sup>SE</sup>IELN<sup>FF</sup>--IQ<sup>R</sup>L<sup>S</sup>SS<sup>F</sup>TR<sup>Y</sup>SDD<sup>Q</sup>PD<sup>V</sup>Y<sup>F</sup>CS<sup>I</sup>N<sup>F</sup>ST<sup>Q</sup>PP<sup>DD</sup>LIE<sup>T</sup>LG<sup>L</sup>LEAN<sup>V</sup>N 146  
Olavius symbiont 1 MAFVTSQQLDAYYDKYKEIDVTF<sup>TK</sup>D<sup>V</sup>AKSLRM<sup>I</sup>Q<sup>N</sup>TH<sup>L</sup>KYKGGQ<sup>RS</sup>CVIY<sup>S</sup>SSL<sup>C</sup>GSKI<sup>I</sup>I<sup>I</sup>ALPN<sup>K</sup>L<sup>L</sup>AKL-Q<sup>T</sup>AKLV<sup>Y</sup>RY<sup>CF</sup>Q<sup>K</sup>EDS<sup>N</sup>DI<sup>S</sup>FI<sup>FT</sup>--V<sup>H</sup>SR<sup>V</sup>I<sup>G</sup>FT<sup>Q</sup>Y<sup>G</sup>DN<sup>-</sup>KE<sup>I</sup>Y<sup>F</sup>AQ<sup>L</sup>EY<sup>T</sup>HR<sup>FP</sup><sup>DD</sup>ALIE<sup>I</sup>IG<sup>L</sup>MLDAN<sup>V</sup>N 144  
Salinispira pacif 1 MSVVTSSQ<sup>I</sup>SKLYDRYSEQ<sup>D</sup>VLF<sup>NK</sup>D<sup>I</sup>NRALLN<sup>T</sup>KG<sup>I</sup>HLR<sup>C</sup>LGYQ<sup>W</sup>PC<sup>I</sup>LY<sup>S</sup>SSM<sup>T</sup>SAK<sup>L</sup>V<sup>V</sup>NV<sup>K</sup>TP<sup>I</sup>KK<sup>V</sup>IEQANR<sup>M</sup>VSL<sup>N</sup>Y<sup>S</sup>FLQ<sup>K</sup>DKAN<sup>P</sup>IS<sup>FF</sup>--M<sup>K</sup>AK<sup>V</sup>VS<sup>Y</sup>AP<sup>Y</sup>H<sup>P</sup>E<sup>K</sup>PD<sup>L</sup>N<sup>L</sup>N<sup>L</sup>E<sup>FA</sup>HR<sup>FP</sup><sup>DD</sup>LIF<sup>R</sup>L<sup>G</sup>ELLEAQ<sup>T</sup>N 144  
Sediminispirochaeta 1 MALM<sup>T</sup>SSQQLNRYNYLKNIDVTF<sup>SK</sup>D<sup>V</sup>IRATGLLAKH<sup>I</sup>FL<sup>K</sup>FLGS<sup>Q</sup>PC<sup>I</sup>I<sup>F</sup>ASMTGAK<sup>V</sup>IANIS<sup>SE</sup>TFERL<sup>R</sup>QANN<sup>L</sup>VSL<sup>R</sup>LS<sup>F</sup>QES<sup>D</sup>KND<sup>P</sup>LAF<sup>FF</sup>--V<sup>A</sup>SK<sup>I</sup>SG<sup>F</sup>N<sup>P</sup>Y<sup>N</sup>KE<sup>H</sup>PT<sup>L</sup>N<sup>F</sup>V<sup>N</sup>LE<sup>F</sup>T<sup>Q</sup>R<sup>FP</sup><sup>DD</sup>LIG<sup>L</sup>IG<sup>L</sup>LEAS<sup>V</sup>N 144  
Spirochaeta afric 1 MSITTSQQLNRYNYLKNIDVTF<sup>TK</sup>E<sup>V</sup>IRASLLN<sup>T</sup>KQ<sup>IF</sup>YLKLLGYQ<sup>W</sup>PC<sup>I</sup>IY<sup>S</sup>SSL<sup>G</sup>AKI<sup>I</sup>ANIT<sup>P</sup>QLKKAM<sup>Q</sup>Q<sup>S</sup>KG<sup>I</sup>S<sup>L</sup>R<sup>FS</sup>FLQ<sup>R</sup>DKR<sup>D</sup>PIS<sup>FF</sup>--V<sup>P</sup>CK<sup>V</sup>AG<sup>F</sup>TP<sup>Y</sup>Q<sup>S</sup>AK<sup>G</sup>N<sup>L</sup>H<sup>F</sup>I<sup>N</sup>M<sup>N</sup>FT<sup>Q</sup>R<sup>FP</sup><sup>DD</sup>LIE<sup>I</sup>L<sup>G</sup>RILEAN<sup>S</sup>A 144  
Spirochaeta therm 1 MAIVTSQQLNRYNYLKNIDVTF<sup>TK</sup>G<sup>I</sup>NA<sup>I</sup>AGL<sup>V</sup>PT<sup>Q</sup>TY<sup>V</sup>KCLDEQ<sup>W</sup>PC<sup>I</sup>IY<sup>S</sup>SSMEGAK<sup>I</sup>ILN<sup>N</sup>KNL<sup>N</sup>MD<sup>K</sup>L<sup>K</sup>EAK<sup>N</sup>L<sup>V</sup>SL<sup>R</sup>FC<sup>F</sup>Q<sup>E</sup>REK<sup>H</sup>Q<sup>P</sup>LS<sup>FF</sup>--V<sup>S</sup>AK<sup>V</sup>AG<sup>I</sup>TP<sup>Y</sup>G<sup>K</sup>Q<sup>D</sup>AS<sup>V</sup>S<sup>F</sup>L<sup>T</sup>LS<sup>Y</sup>TH<sup>R</sup>FP<sup>DD</sup>LIE<sup>I</sup>L<sup>G</sup>LLEAN<sup>I</sup>N 144  
Treponema primitia 1 MSVLTSSQ<sup>I</sup>ASYYERYKEIDVTF<sup>TK</sup>E<sup>I</sup>I<sup>Q</sup>VTGLIT<sup>Q</sup>QVLLK<sup>C</sup>VGDF<sup>W</sup>PC<sup>V</sup>IY<sup>S</sup>SS<sup>F</sup>QGAK<sup>V</sup>VANIK<sup>S</sup>GLTE<sup>K</sup>LQ<sup>Q</sup>ANN<sup>S</sup>VSL<sup>R</sup>L<sup>CF</sup>KS<sup>A</sup>DS<sup>A</sup>S<sup>P</sup>VT<sup>FF</sup>--V<sup>T</sup>ARV<sup>A</sup>G<sup>Y</sup>SP<sup>Y</sup>GG<sup>-</sup>SSD<sup>T</sup>AL<sup>F</sup>TL<sup>L</sup>FT<sup>Q</sup>R<sup>FP</sup><sup>DD</sup>LIE<sup>I</sup>M<sup>G</sup>RIL<sup>D</sup>AN<sup>I</sup>N 143  
T. azotonutricium 1 MG<sup>V</sup>V<sup>T</sup>SSQ<sup>I</sup>ITVY<sup>D</sup>RE<sup>F</sup>KTIDVTF<sup>TK</sup>E<sup>I</sup>I<sup>Q</sup>VTSLI<sup>N</sup>QV<sup>L</sup>KCGS<sup>D</sup>FW<sup>PC</sup>VY<sup>S</sup>SS<sup>F</sup>QGAK<sup>I</sup>VANIK<sup>S</sup>GLL<sup>H</sup>KLE<sup>Q</sup>AN<sup>M</sup>AS<sup>L</sup>R<sup>FS</sup>SK<sup>N</sup>P<sup>D</sup>T<sup>G</sup>SP<sup>V</sup>T<sup>FF</sup>--I<sup>N</sup>T<sup>K</sup>SL<sup>G</sup>Y<sup>S</sup>AY<sup>G</sup>G<sup>-</sup>SAD<sup>V</sup>AL<sup>N</sup>LQ<sup>F</sup>T<sup>Q</sup>R<sup>FP</sup><sup>DD</sup>LIE<sup>I</sup>M<sup>G</sup>RIL<sup>D</sup>AN<sup>V</sup>N 144  
T. brennaborense 1 MG<sup>V</sup>V<sup>T</sup>SSQ<sup>I</sup>LLRY<sup>E</sup>LY<sup>R</sup>D<sup>K</sup>E<sup>V</sup>TF<sup>SK</sup>E<sup>V</sup>IK<sup>T</sup>L<sup>N</sup>L<sup>D</sup>PR<sup>Q</sup>VY<sup>I</sup>K<sup>T</sup>DSQ<sup>W</sup>PC<sup>I</sup>INS<sup>T</sup>S<sup>F</sup>QGAK<sup>I</sup>I<sup>I</sup>GS<sup>K</sup>GA<sup>Y</sup>AR<sup>L</sup>SQ<sup>E</sup>K<sup>G</sup>TV<sup>N</sup>L<sup>R</sup>FL<sup>Q</sup>AD<sup>K</sup>-Q<sup>P</sup>IS<sup>FF</sup>--I<sup>G</sup>SR<sup>V</sup>E<sup>I</sup>TP<sup>Y</sup>M<sup>N</sup>-SP<sup>D</sup>LAV<sup>S</sup>LAY<sup>I</sup>Q<sup>R</sup>FP<sup>DD</sup>ALIE<sup>C</sup>I<sup>G</sup>LLEAN<sup>I</sup>N 142  
T. caldarium 1 MG<sup>V</sup>LTSSQ<sup>I</sup>ITK<sup>Y</sup>ERY<sup>R</sup>TIS<sup>V</sup>TF<sup>TK</sup>E<sup>I</sup>I<sup>T</sup>ATGL<sup>V</sup>TQ<sup>Q</sup>VYLK<sup>L</sup>CLGEAW<sup>W</sup>PC<sup>V</sup>IY<sup>S</sup>ST<sup>S</sup>FEEAK<sup>V</sup>I<sup>I</sup>NT<sup>K</sup>SG<sup>L</sup>Y<sup>G</sup>L<sup>Q</sup>QANN<sup>L</sup>VN<sup>RY</sup>S<sup>F</sup>K<sup>I</sup>S<sup>D</sup>K<sup>T</sup>DP<sup>M</sup>FF<sup>FF</sup>--V<sup>S</sup>CR<sup>V</sup>VS<sup>A</sup>PY<sup>Q</sup>G<sup>-</sup>SQ<sup>D</sup>ISM<sup>M</sup>T<sup>L</sup>Q<sup>F</sup>T<sup>Q</sup>R<sup>FP</sup><sup>DD</sup>LIE<sup>I</sup>M<sup>G</sup>RIL<sup>D</sup>AN<sup>I</sup>N 143  
T. maltophilum 1 MG<sup>V</sup>M<sup>T</sup>SSQ<sup>I</sup>ISRE<sup>Y</sup>DSY<sup>R</sup>NTE<sup>M</sup>FS<sup>K</sup>E<sup>T</sup>IKAL<sup>N</sup>L<sup>D</sup>PR<sup>Q</sup>VY<sup>I</sup>K<sup>C</sup>NSG<sup>Q</sup>W<sup>PC</sup>IINS<sup>S</sup>SL<sup>S</sup>IAR<sup>I</sup>I<sup>I</sup>GT<sup>K</sup>GAYAA<sup>I</sup>Q<sup>V</sup>NT<sup>P</sup>V<sup>S</sup>L<sup>R</sup>FF<sup>FF</sup>SD<sup>P</sup>NG<sup>-</sup>Q<sup>T</sup>MS<sup>FF</sup>--V<sup>N</sup>AH<sup>V</sup>SAM<sup>D</sup>PY<sup>M</sup>N-SKE<sup>L</sup>A<sup>I</sup>A<sup>T</sup>LANS<sup>K</sup>FP<sup>DD</sup>LIE<sup>I</sup>V<sup>R</sup>LLE<sup>T</sup>KDN 142

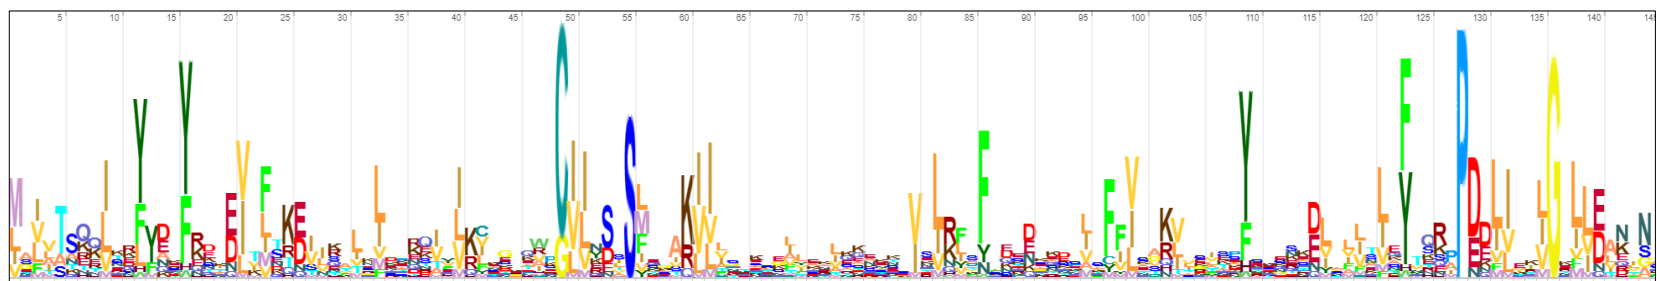

**Figure S4. Sequence alignments of the newly identified xPilZ domains.**

A. Sequence alignment of select representatives and an HMM logo of the PilZ<sub>N3</sub> domain, generated by the HMMer search at the EBI web site <https://www.ebi.ac.uk/Tools/hmmer/>. The top line shows secondary structure prediction by JPred. The sequences from *Borrelia burgdorferi* BB0733, *Treponema denticola* TDE0214, and *Treponema pallidum* TP\_0086 are linked to their UniProt entries, sequences from other organisms are linked to the respective entries in NCBI protein database.



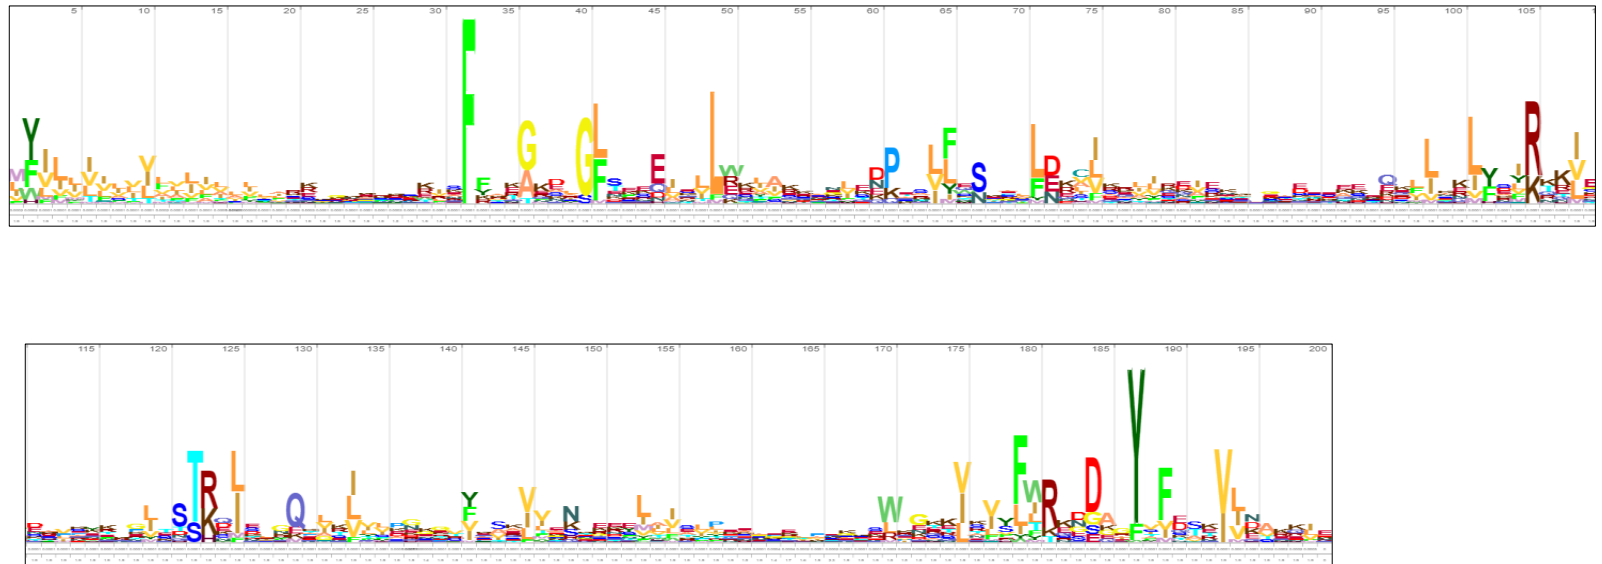

**Figure S4. Sequence alignments of the newly identified xPilZ domains.**

**B.** Sequence alignment of select representatives and an HMM logo of the PilZ<sub>N4</sub> domain, generated by the HMMer search at the EBI web site <https://www.ebi.ac.uk/Tools/hmmer/>. The top line shows secondary structure prediction by JPred. The sequences from *Treponema denticola* and *Aquifex aeolicus* are linked to their UniProt entries, sequences from other organisms are linked to the respective entries in NCBI protein database.

C

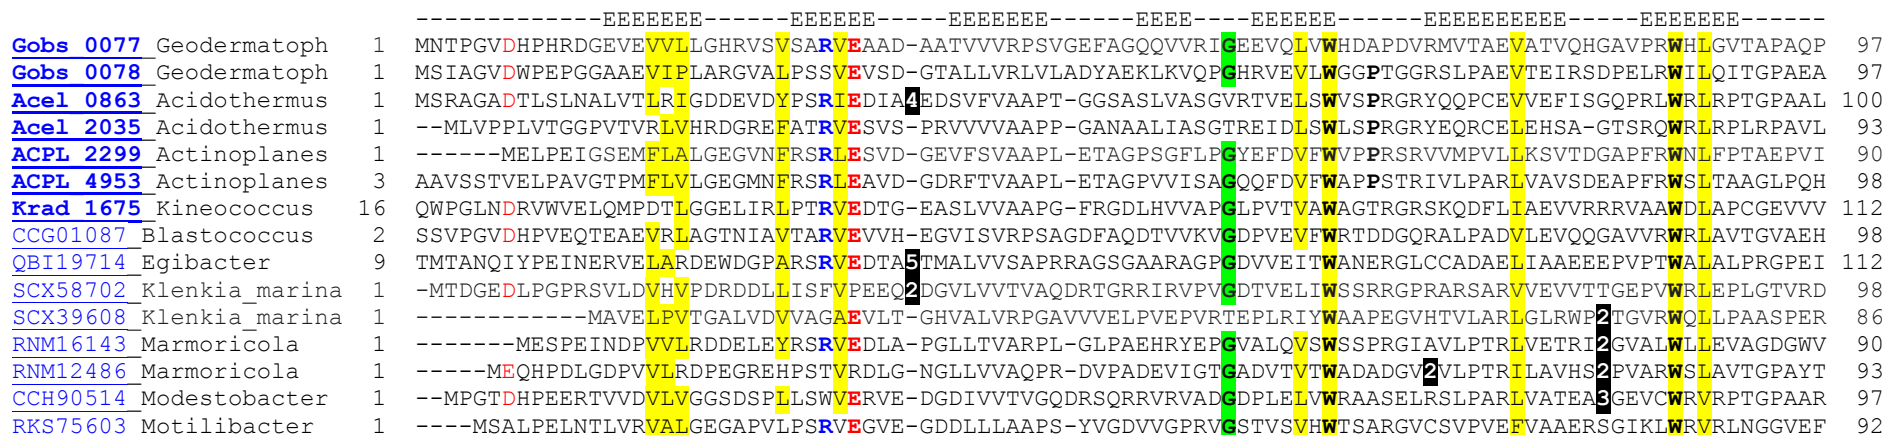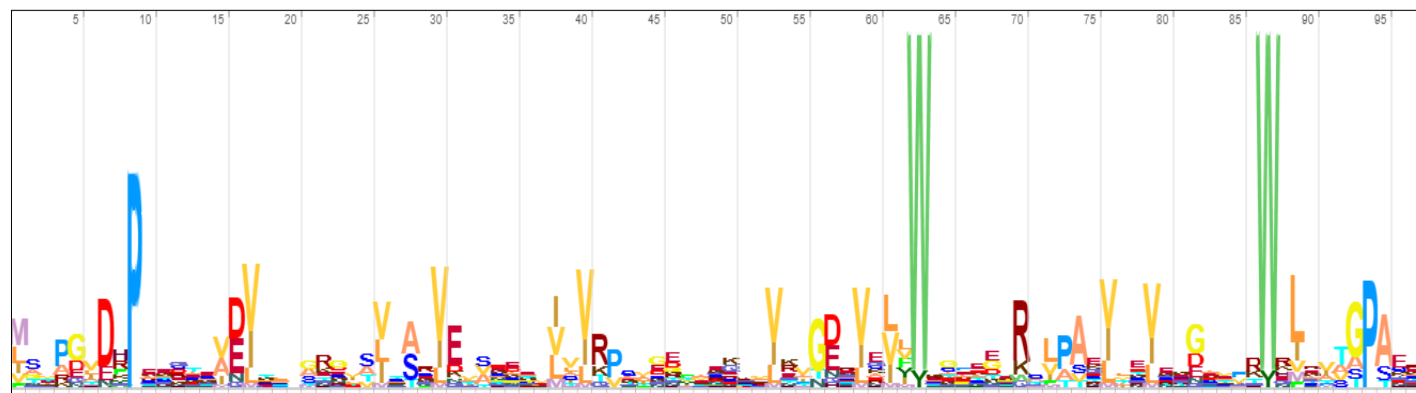

**Figure S4. Sequence alignments of the newly identified xPilZ domains.**

C. Sequence alignment of select representatives and an HMM logo of the PilZ<sub>N5</sub> domain, generated by the HMMer search at the EBI web site <https://www.ebi.ac.uk/Tools/hmmer/>. The top line shows secondary structure prediction by JPred. The sequences from *Geodermatophilus obscurus*, *Acidothermus cellulolyticus*, *Actinoplanes* sp. SE50/110, and *Kineococcus radiotolerans* are linked to their UniProt entries, sequences from other organisms are linked to the respective entries in NCBI protein database.





```

--EEE-----EEEE-----HHHHHHHHHH-----EEEEEEHHHHHH-----EEEEEE-----EEEEEEEEEEEEEE-----EEEHHHHHHHH--
Cthe 0108 H.thermocellum 1 --MEIKVGD LVSIRHFSGTKLFKSLVLESN-NDEVLLKLTEDIALLNCSIGDPIVVLGCELEENVYISSCTTLNVDKQQ-NTLKLKIDNYETTSN 90
Cthe 0697 H.thermocellum 5 LLPQNDSPICFRVSIINDEKQVHGIIITYIN2KNIAEITFLSAKYFKSYFNEGSKIIVKSLDENIETLFGSGSVSKKVISI2QAITIQINKVLSYNN 100
Cthe 0733 H.thermocellum 1 --MKLRVGEIVTLKHYSAKRSNRGIIISNSF-DNNVVIKPERDFLIYNFFDSDPVIIGFENDNVVNICESTVKHVVDYDQ-NTFTLTINHIQSITN 90
Cthe 0868 H.thermocellum 6 LRDFLSEGAIIIRTKHCNSTNWTNVVYAIN2WIEVDIIGLEKDYIDNIIMIGDTMRCKYSTDEYEFMLIGWVTKIKLEEFQSITIKIHDVERFAN 100
Cthe 0888 H.thermocellum 24 KEEIFRRGAVISIKHGVIYFEPVLSVIQKCE-GECIYFRIPPEEFLKNNVFKGDVVSQVMQGEYEVIVSGIISEFEITYEPLVEVAIKRVSKVKN 116
Cthe 1065 H.thermocellum 21 PAKVVKLGSVDIKHFKMFYINAELVGLKT-DDSIKVEAKDVLKETLFFPGDHVVVNYSENTQDLFVMDGNINHVYDINFLIIDVKINKVEKLD 113
Cthe 1173 H.thermocellum 1 ----MKVGEIASICHYSGKTFWKS VV LQVE-KDLLVVKLVKEFVILNLENLDPVVLGYEENDEVFAGCIVKGIIDPC-SYIKLKVSVRSLKE 88
Cthe 1865 H.thermocellum 6 VSKVLKEGTVVNTKLRNGDIWIQNIIVYRTE-KHMISIALLENYLENIIMLQGITITIKYSSEHSEILFEGEIVKIRPEYFSYITIDIKDIKEVKN 98
Cthe 2893 H.thermocellum 11 LFNVMQYTNLVRVRFENDDVWTVLPILYAG-EDQVDILVDASKITLPGDVCCKAVIKFQRKGYEYIINGHIDNKSEDAFATVTIKYIDAKKYNN 103
RCX18322 Anaerobacterium 6 ISSILKEGLVASTKLGYYDDTWHQNVYIRCV-ENIWIISLPQYYIQNIIMDGSKITIKYCNEFFEYLFEGVAFDIPDPYAHVKVSVHSHVHEIVN 98
RCX19951 Anaerobacterium 10 SEPIIPKGAFAFIRHQYADEPAMGIIRDIDIR-GKLIYICVNGDFKKYNECKQEQVSCRLLVDGRYEYDVCVSVDFSAVNFAGVICVSSISKYEN 102
RCX08903 Anaerobacterium 11 LMNVMQDLNIVKVKFRNGDNWLIALLLYAD-ESNIEILFDSPIYSENLLPY-QEAILKFKQKEGYEYLVSGEVTTANASNPKAATLRVSMQKYS 102
RCX17134 Anaerobacterium 8 KEYNKSLSITALVPHYTVNLPNAVLSLS-EKNIVMRLEDESQQRDFSEGDPVVIAYNSGGEVIVKGFVKKLNSDG--TIELDGELESDAN 98
KNY24867 Pseudobacteroides 6 LGKYLKVGSIKTKIDASPAAITNIVYSIS2FIQVNIIGLEKNYIENLIMIGDVTVKCKYTSNEIEIMFIGWVTKIHMDFQRITIKVHQLNVFDN 100
KNY25286 Pseudobacteroides 3 NMEYFKRGTVISMSHASMSEPTLTVVQKIE-GHNLYEKLPMFELKRNVFKGDKINAQVFGDEYELVINGIISDIDFKYFNYVQVQVDRIDKYRN 95
KNY25755 Pseudobacteroides 20 SLKVIKRVSSDIGMKHYNVVNNLVATVELVN-DPIIKLTIKEGMDLALAPRDIIVLSYNSDNDVYLLSASIIISIEDDEYQFTVSSLKIEKLD 112
KNY26719 Pseudobacteroides 32 IINIMQKGSFIKTQFYGSNKWNVNLVDNT-NNMLKVAFIEDDGI PALLPGDNIRCFEAVDTYDVMMLCTIDRMKDFLPTKSLRILKADIWKN 124
KNY26764 Pseudobacteroides 6 VMAYLPGYFVRVQASQNNLWSMNTFLKVN-RDSLVMPTNELLNASVLINDFVVKCKFNIGKNIITLTCMVEDI SLALFQTIKLIKIKIDVFQD 98
KNY27276 Pseudobacteroides 7 IENILPEKSIKTRHPGSDYDWTITIRKAY-GNCIEVEQVEDYMKVIMIGDNLLIKYSNDEYLYTIESTVQEIKFAS-RAVLLTVNSIKRIKN 98
KNY28482 Pseudobacteroides 1 --MNIKAGEIVSIRHCSGKTKLYKSIVLDTI-DDILSVKLFEEVALLNCSGPDVVLGCELDNEVYMGSCNLLDIDKDN-NKLSLKIDNYETITN 90
KNY29812 Pseudobacteroides 1 --MELKTDKIVLVSHYSAVKPFRCDIIDAS-DSSITLRLTKQFSILNLELGGPAVIMIKQNNIINIGCNVTSIEPKA-NVIKLRIDTIEPGSE 90
KNY30394 Pseudobacteroides 1 --MFTKPGEIIISISHHSINILRSEVVVDQD4GQVLAITHIMKEFADCMLEFEGDTVAIAFRSGDNIVTTSCHIIINIDIDK-NVMQLVVENEEYVIN 94
OPX45492 Ruminiclostridium 6 ISKLIIVPGSLVSRFKLNQSAWSLNIITECI-EDTICLPFTNDLLRACLFSGTPVDIKFNNQYVEYIILNCSVVKIELSRFPYIRVKVHNICESQN 98
EMS70862 Ruminiclostridium 6 ISKLIIPGALISFRIFNQTVVSLNIVSQCS-GDTLNIPLTNDLMKACLFTNTNVEIKYKNEYFEYNIKGVISKIIELSASPYINVKIDHVAANLN 98

```

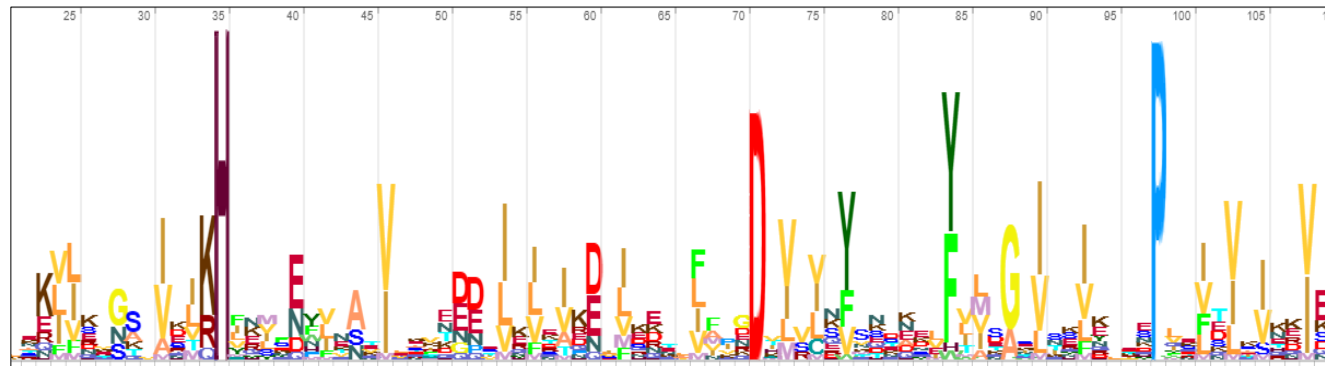

**Figure S4. Sequence alignments of the newly identified xPilZ domains.**

E. Sequence alignment of select representatives and an HMM logo of the PilZ domain, generated by the HMMer search at the EBI web site <https://www.ebi.ac.uk/Tools/hmmer/>. The top line shows secondary structure prediction by JPred. The sequences from *Hungateiclostridium* (formerly *Clostridium*) *thermocellum* are linked to UniProt, sequences from other organisms are linked to the respective entries in NCBI protein database.
